# Supplementary material
Source: PubMed Central journal article supplement (PMC7480321)
Supplement: NIHMS1621417-supplement-1.pdf [file NIHMS1621417-supplement-1.pdf]

**Cell Systems, Volume 11**

**Supplemental Information**

**Best Practices for Making Reproducible**

**Biochemical Models**

**Veronica L. Porubsky, Arthur P. Goldberg, Anand K. Rampadarath, David P. Nickerson, Jonathan R. Karr, and Herbert M. Sauro**

## General-Purpose Reproducible Biochemical Modeling Checklist

### Data aggregation:

- New data collection and experimental procedures are reproducible
  - The experimental protocol is provided
  - Conditions that deviate from the standard protocol are provided
  - Measurement uncertainty is quantified
  - A record of when the data was collected is provided
  - A record of the individual or lab that produced the data is provided
- Data collected from databases and literature are curated and metadata are provided
  - All manipulations applied to measurements are described and the original data is referenced (e.g. statistical analyses, normalization)
  - Database and data source entries are provided
  - Ownership of the original data is credited

### Model construction:

- All species and parameter names are biologically-relevant and unambiguous
  - Shortened identifiers used in the model description are linked to the full species or parameter name in a supplemental table
  - The full species or parameter names follow standardized naming conventions
- All reactions are uniquely identified
- Model components are described in computer-readable tables and automatically imported by simulation study code
- If a model uses differential equations, then its biochemical reactions and differential equations are both reported

### Parameter estimation:

- Software generated to perform parameter estimation is provided
- Confidence intervals are reported on estimated parameters
- Families of parameter values are reported for non-identifiable models, if there are a discrete number of possibilities
- Uncertainty quantification is performed

### Simulation:

- All initial conditions and parameter values are provided for each published simulation experiment
  - Well-documented tables of parameter values for each unique simulation experiment are provided with the publication
- All simulation experiments are fully defined (events listed, collection times and measurements specified, algorithms provided, simulator specified, etc.)
- Algorithms required for executing the simulation are reported
  - Numerical integration algorithms are reported

- Stochastic algorithms are reported
- Random number generator algorithms are reported
- Other algorithms are reported (e.g. steady state methods)
- Stochastic simulations are repeated to generate a representative distribution of simulation results
  - Seeds are recorded for each simulation result, a method for obtaining the seeds is provided, or a method for generating a statistically-similar distribution of results is provided

**Results storage:**

- All data is provided in supplemental tables or computer-readable spreadsheets (e.g. HDF file)
  - Unprocessed results are provided
- All data is annotated for comprehension
- Source data and code to produce published figures is provided

**Verification & validation:**

- All custom modeling code is systematically verified
  - A program is written which checks that all model components and numerical methods exhibit expected behavior
- The model and associated simulation experiments are validated to assess biological relevance
- The model and associated simulation experiments are tested in an independent computing environment to ensure that the software is portable and reproducible

**Documentation:**

- All data and software used to construct the model are documented
- Installation and usage instructions are recorded for the model and associated software (e.g. as a README file)
- Design decisions and assumptions are recorded
  - The biological relevance of the modeling study, including mathematical descriptions, and any simplifying assumptions are justified
  - The biological system context is described
  - The environmental context is described
- The model and all associated programs for simulation, analysis, and verification and validation are explained through comments
- Figures visualize the model—all components and interactions—and the results of simulation experiments, include detailed figure legends

**Packaging:**

- All model artifacts are organized in a single archive
- The model archive contains sub-directories which are described, along with all model artifacts, in a manifest file

**Dissemination:**

- The modeling study is disseminated in a pre-print server (e.g. bioRxiv)
- The modeling study is published in a peer-reviewed journal
- The model and source code are available at a public repository or personal web site
  - A permissive license to use repository materials is provided
